# Supplementary material for: Insights into the Genetic Variations of Human Cytochrome P450 2C9: Structural Analysis, Characterization and Comparison
Source: MDPI journal article supplement (doi:10.3390/ijms221910206), 2021-09-22
Supplement: s1 [file s1]

# Insights into the Genetic Variations of Human Cytochrome P450 2C9: Structural Analysis, Characterization and Comparison.

Sonia J. Parikh <sup>1</sup>, Sumit Kamat <sup>1,#</sup>, Margaret Phillips<sup>1,3,#</sup>, Samuel P. Boyson <sup>1</sup>, Thomas Yarbrough <sup>1</sup>, Dylan Davie <sup>1</sup>, Qinghai Zhang <sup>2</sup>, Karen C. Glass <sup>1,3</sup> and Manish B. Shah <sup>1,\*</sup>

<sup>1</sup>Department of Pharmaceutical Sciences, Albany College of Pharmacy and Health Sciences, 106 New Scotland Avenue, Albany, NY 12208, USA. <sup>2</sup>Department of Integrative Structural and Computational Biology, The Scripps Research Institute, 10550 North Torrey Pines Road, La Jolla, CA 92037 USA. <sup>3</sup>Department of Pharmacology, Larner College of Medicine, University of Vermont, Burlington, VT 05405, USA. #Contributed equally.

**Corresponding author:** Manish B. Shah, Department of Pharmaceutical Sciences, Albany College of Pharmacy and Health Sciences, 106 New Scotland Avenue, Albany, NY 12208, USA.  
E-mail: [manish.shah@acphs.edu](mailto:manish.shah@acphs.edu), Phone: 518 694 7343, Fax: 518 694 7499.

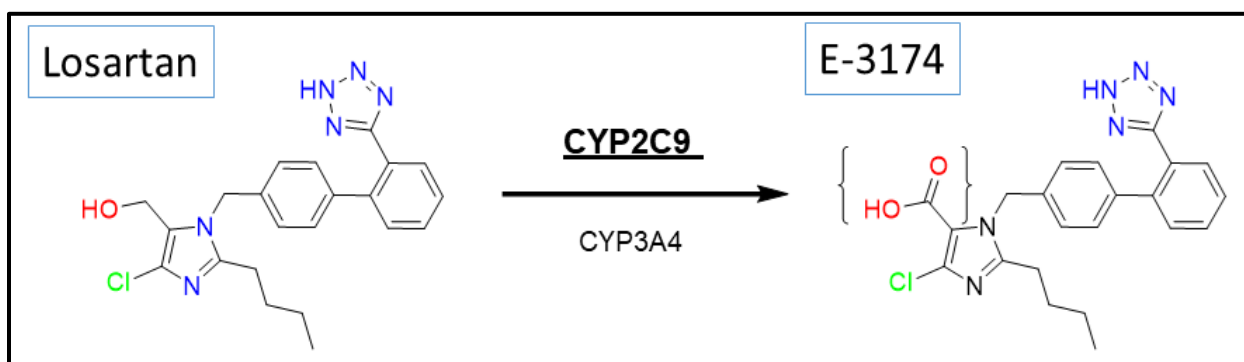

**Figure S1:** Metabolism scheme of the prodrug losartan to the active form E3174 primarily catalyzed by CYP2C9. Structures were made using ChemDraw Professional 15.1.

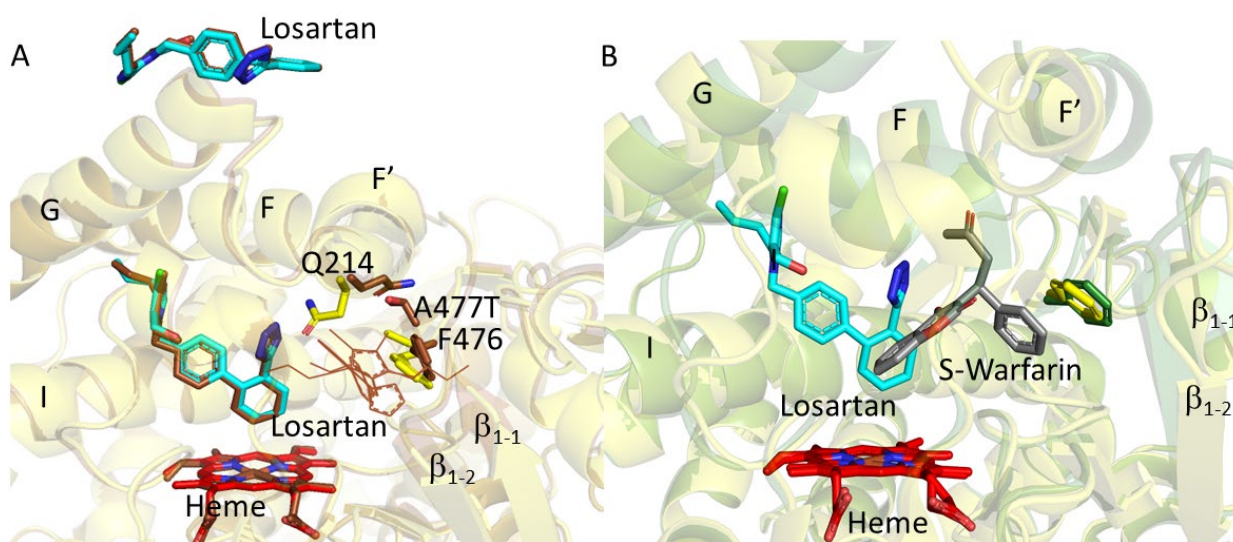

**Figure S2:** Structural overlay of CYP2C9\*8-losartan complex. (A) Structure of the \*8 variant (yellow, PDB ID 7RL2) superimposed on to the CYP2C9\*30 complexed with losartan (brown, PDB ID 5X23) of CYP2C9. The losartan in \*8 structure is shown in cyan sticks, whereas in the \*30 structure is shown in brown sticks. The losartan in the access channel of the \*30 structure is shown in thin lines for clarity. The sidechains of Q214 and F476, and amino acid substitution at A477T (\*30) is shown in sticks. (B) Structure of the \*8 variant (yellow, PDB ID 7RL2) superimposed on to the s-warfarin complex (green, PDB ID 1OG5) of CYP2C9. The s-warfarin is shown in gray sticks, whereas losartan in the active site of \*8 complex is shown as cyan stick representation. The sidechain of F476 is shown located near s-warfarin in yellow (\*8) and green (s-warfarin bound) sticks. Heme is shown in red sticks.

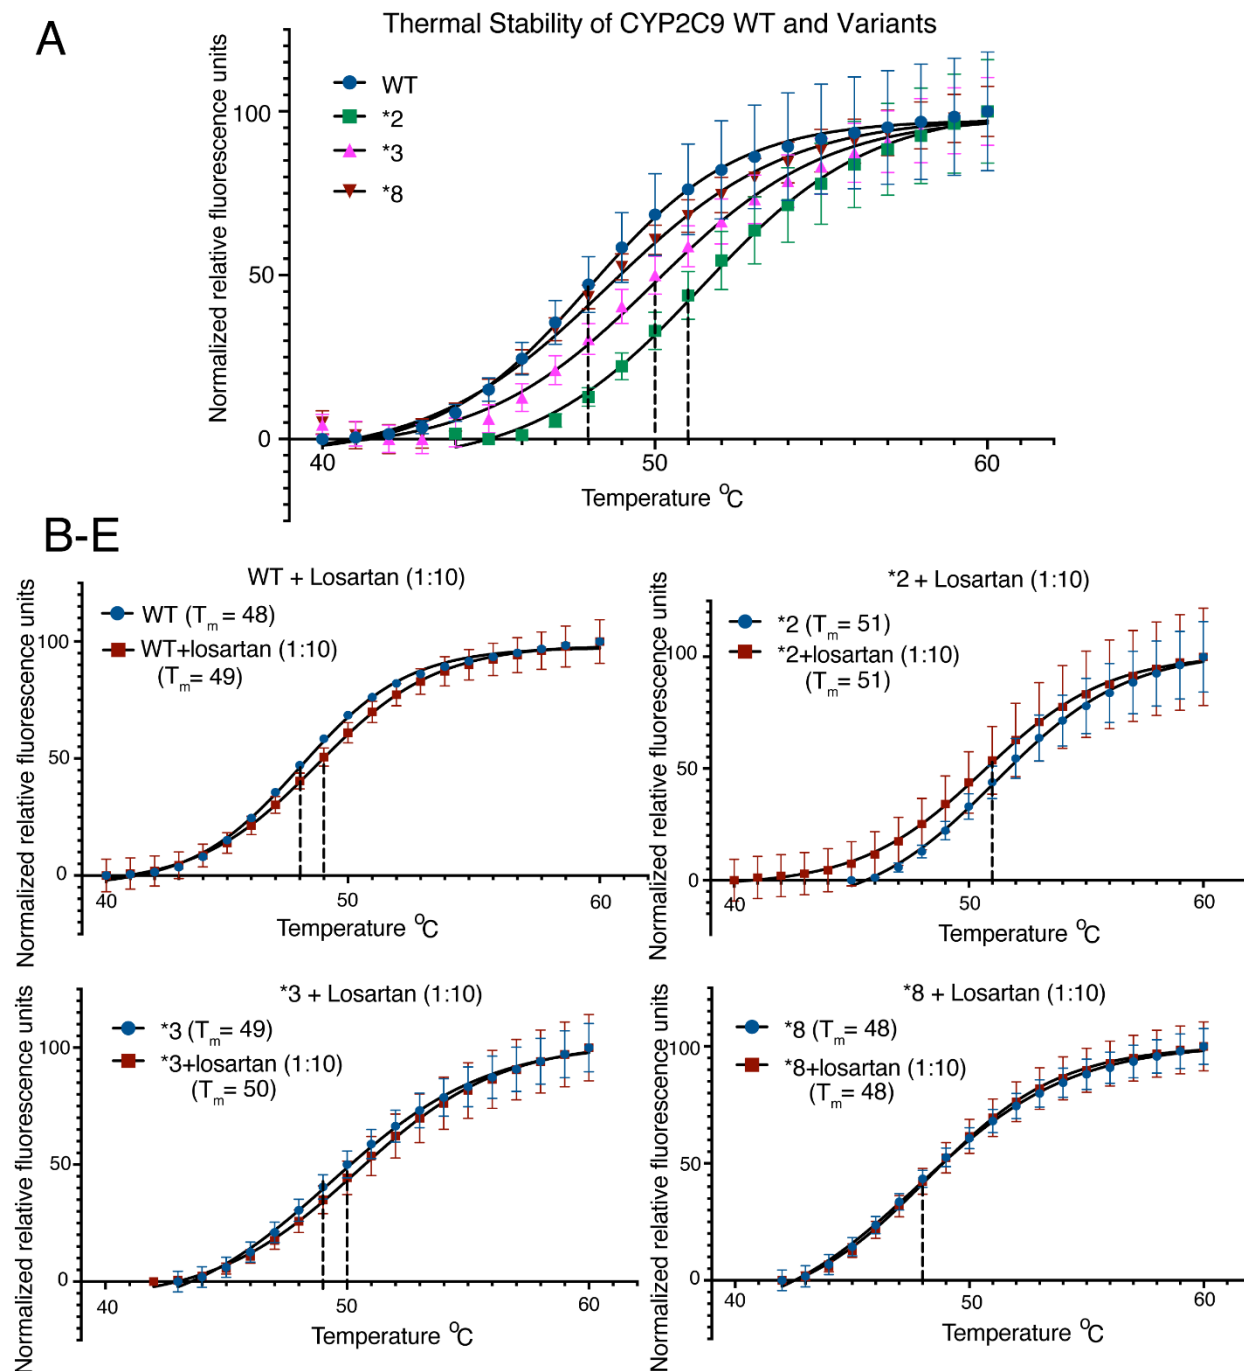

**Figure S3:** Thermal stability assay of CYP2C9 WT and the variants. A) The unfolding curve of apo CYP2C9 WT (blue) with  $T_m = 48$  °C, \*2 variant (green) with  $T_m = 51$  °C, \*3 variant (pink) with  $T_m = 50$  °C and \*8 variant (red) with  $T_m = 48$  °C. (B-E) The unfolding curves for WT and variants in the presence and absence of losartan in a 1:10 molar ratio (protein: losartan). The melting temperature is highlighted with broken line.

| Protein Name | Apo Protein $T_m$ (°C) | Protein + Losartan (1:10 molar ratio) $T_m$ (°C) | $\Delta T_m$ |
|--------------|------------------------|--------------------------------------------------|--------------|
| CYP2C9 WT    | 48.02 ± 0.20           | 48.71 ± 0.19                                     | +0.69        |
| CYP2C9 *2    | 51.14 ± 0.27           | 50.67 ± 0.35                                     | -0.47        |
| CYP2C9 *3    | 49.33 ± 0.68           | 50.40 ± 0.38                                     | +1.07        |
| CYP2C9 *8    | 47.81 ± 0.48           | 48.20 ± 0.19                                     | +0.39        |

**Table S1:** Melting temperatures of CYP2C9 WT, \*2, \*3 and \*8 in the absence (apo) or presence of the drug substrate losartan in a 1:10 molar ratio. The difference in temperature is represented by  $\Delta T_m$ .

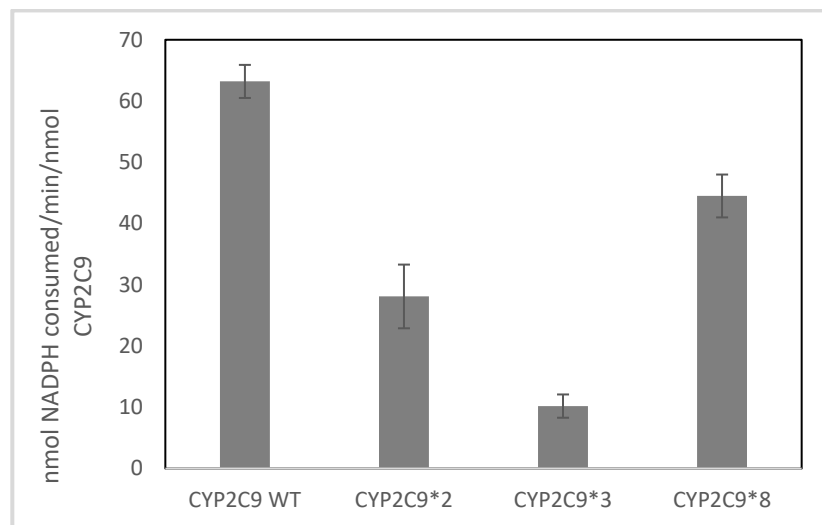

**Figure S4:** The amount of NADPH consumed in nmol per minute per nmol CYP2C9 enzymes in the presence of 10  $\mu$ M losartan.

**Table S2:** Crystallographic data collection and refinement statistics.

|                                     |                                                               |
|-------------------------------------|---------------------------------------------------------------|
| Protein                             | CYP2C9*8                                                      |
| Ligand                              | Losartan                                                      |
| PDB                                 | 7RL2                                                          |
| Crystal Space group                 | <i>I</i> 222                                                  |
| <b>Crystal Unit Cell Parameters</b> |                                                               |
| a (Å)                               | 75                                                            |
| b (Å)                               | 143.2                                                         |
| c (Å)                               | 163.8                                                         |
| $\alpha = \gamma = \beta$ (°)       | 90                                                            |
| <b>Data Collection Statistics.</b>  | Values for highest resolution shell are shown in parentheses. |
| Light source and beamline           | SSRL 12-2                                                     |
| Wavelength (Å)                      | 0.9                                                           |
| Resolution range (Å)                | 40.2-2.23<br>(2.35-2.23)                                      |
| Completeness (%)                    | 98.6 (99.5)                                                   |
| Redundancy                          | 7.4 (8.2)                                                     |
| Mean I/sigma (I)                    | 8.6 (1.7)                                                     |
| R <sub>merge</sub>                  | 0.128 (1.7)                                                   |
| Total reflections                   | 42981                                                         |

|                                    |                                                                 |
|------------------------------------|-----------------------------------------------------------------|
| <b>Refinement Statistics.</b>      |                                                                 |
| <i>R</i> -factor (%)               | 17 (42)                                                         |
| <i>R</i> <sub>free</sub> (%)       | 22 (44)                                                         |
| <b>RMS Deviations</b>              |                                                                 |
| Bond lengths (Å)                   | 0.01                                                            |
| Bond angles (°)                    | 2.2                                                             |
| Average B factor (Å <sup>2</sup> ) | 59.6                                                            |
| <b>Ramachandran Plot</b>           |                                                                 |
| Favored (%)                        | 95.3                                                            |
| Outliers (%)                       | 0                                                               |
| <b>Number of Atoms</b>             | Average <i>B</i> -factors (Å <sup>2</sup> ) are in parentheses. |
| Protein                            | 3625 (62.83)                                                    |
| Heme                               | 43 (40.1)                                                       |
| Solvent                            | 125 (62.19)                                                     |
| Losartan                           | 60 (59.5)                                                       |
